# Supplementary material for: Feedback for Promoting Motor Skill Learning in Physical Education: A Trial Sequential Meta-Analysis
Source: MDPI journal article supplement (doi:10.3390/ijerph192215361), 2022-11-21
Supplement: s1 [file s1]

Table S1. Comparison with Recent Systematic Reviews on Same Topic

| Author                             | Zhou/2021 [24]              | Mödingen/2021 [25] | Han/2022 [14]               | The Present Study                  |
|------------------------------------|-----------------------------|--------------------|-----------------------------|------------------------------------|
| Meta-analysis                      | NA                          | NA                 | NA                          | Applied                            |
| Search strategy until (month/year) | April 2021                  | June 2020          | June 2022                   | September 2022                     |
| Trial sequential analysis          | NA                          | NA                 | NA                          | Applied                            |
| GRADE                              | NA                          | NA                 | NA                          | Applied                            |
| Research focus                     | Feedback format and content | Feedback format    | Feedback format and content | Feedback format, content, schedule |
| VIF on MSL (SMD, 95% CI)           | NA                          | NA                 | NA                          | 0.71 [0.14, 1.28]                  |
| VEF on MSL (SMD, 95% CI)           | NA                          | NA                 | NA                          | -0.09 [-1.01, 0.83]                |
| VIF + VEF on MSL (SMD, 95% CI)     | NA                          | NA                 | NA                          | 1.15 [0.26, 2.05]                  |
| VSM on MSL (SMD, 95% CI)           | NA                          | NA                 | NA                          | 1.15 [0.00, 2.29]                  |
| VEM on MSL (SMD, 95% CI)           | NA                          | NA                 | NA                          | 0.85 [-0.01, 1.70]                 |
| EVF on MSL (SMD, 95% CI)           | NA                          | NA                 | NA                          | -1.28 [-5.59, 3.04]                |
| COF on MSL (SMD, 95% CI)           | NA                          | NA                 | NA                          | 1.49 [-0.02, 3.00]                 |
| INF on MSL (SMD, 95% CI)           | NA                          | NA                 | NA                          | 0.64 [-0.41, 1.70]                 |
| TRF on MSL (SMD, 95% CI)           | NA                          | NA                 | NA                          | 0.74 [0.18, 1.30]                  |
| CMS on MSL (SMD, 95% CI)           | NA                          | NA                 | NA                          | 0.62 [0.10, 1.13]                  |
| SMS on MSL (SMD, 95% CI)           | NA                          | NA                 | NA                          | 0.73 [0.22, 1.24]                  |

Abbreviations: NA-not applied; GRADE-Grading of Recommendations Assessment, Development, and Evaluation; SMD-Std. mean difference; CI-confidence interval; MSL-motor skill learning; VIF-visual feedback; VEF-verbal feedback; VIF + VEF-visual combined verbal feedback; VSM-visual self-model; VEM-visual expert model; EVF-evaluative feedback; COF-corrective feedback; INF-informative feedback; TRF-teacher regulated feedback; CMS-complex motor skills; SMS-simple motor skills.

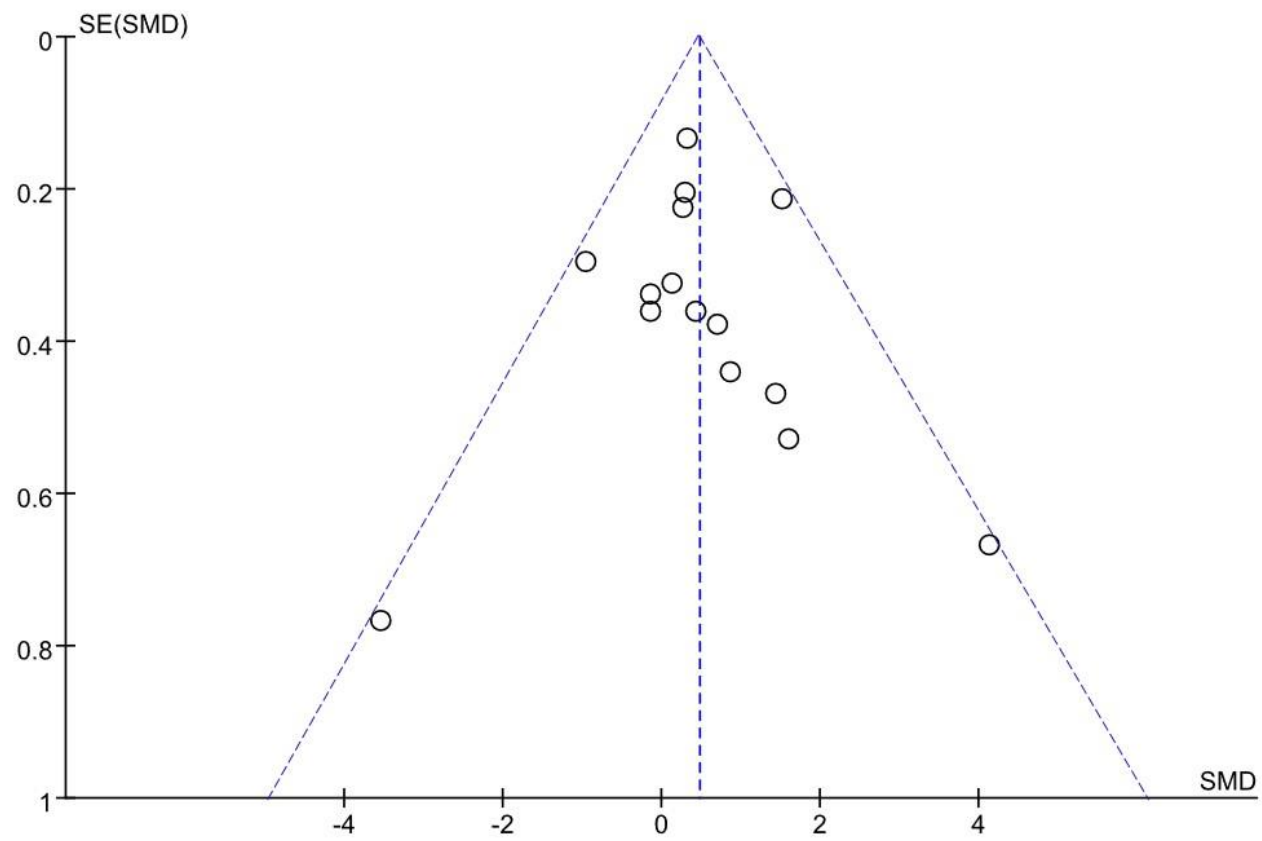

Figure S1. Funnel Plot for Publication Bias
